# Supplementary material
Source: Springer Nature journal article supplement (https://www.springermedizin.de/resource/supplementary/12876_2013_1073_MOESM2_ESM.pdf/9438402)
Supplement: MOESM2 [file 9438402]

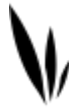

WM. K. WARREN  
**MEDICAL RESEARCH CENTER**  
 FOR CELIAC DISEASE

**Application for Celiac Disease Screening Program**

**APPLICANT INFORMATION [please print]**

Today's Date: \_\_\_\_\_

Name: \_\_\_\_\_

Date of Birth: \_\_\_\_\_

Email address: \_\_\_\_\_

Gender:  Male  Female

Home Address: \_\_\_\_\_

Telephone #(s): \_\_\_\_\_ Type:  Home  Cell  Work

\_\_\_\_\_ Type:  Home  Cell  Work

\_\_\_\_\_ Type:  Home  Cell  Work

**How did you hear about the Warren Celiac Center screening program?**

**Please provide a reason for why you want to be screened for Celiac Disease.**

**RISK FACTORS (check all that apply to you):**

**I have a family member with celiac disease.**

*If yes, please provide relationship (i.e. father, mother, sister, brother, uncle, etc):* \_\_\_\_\_

**I have chronic gastrointestinal complaints, such as abdominal pain, bloating/gas, diarrhea, constipation, or unexplained weight loss.**

*If yes, please specify most bothersome symptom(s)* \_\_\_\_\_

**I have non-gastrointestinal complaints associated with celiac disease such as (check all that apply):**

- |                                                                                                                                      |                                                                                   |
|--------------------------------------------------------------------------------------------------------------------------------------|-----------------------------------------------------------------------------------|
| <input type="checkbox"/> Sjögren's Syndrome                                                                                          | <input type="checkbox"/> Autoimmune thyroid disease                               |
| <input type="checkbox"/> Type I Diabetes Mellitus                                                                                    | <input type="checkbox"/> Iron deficiency or anemia where the cause is unknown     |
| <input type="checkbox"/> Unexplained Infertility/miscarriages                                                                        | <input type="checkbox"/> Dermatitis Herpetiformis (a blistering, itchy skin rash) |
| <input type="checkbox"/> Osteoporosis or bone disease. If yes, please provide age at diagnosis _____                                 |                                                                                   |
| <input type="checkbox"/> Liver disease, either autoimmune or primary biliary cirrhosis or unexplained cause for abnormal liver tests |                                                                                   |

**DIRECTIONS**

Return completed application by **JUST ONE** of the following methods

|                                                                                                                                                                                                         |                                                                                                      |                                                                                                                                                                                                 |
|---------------------------------------------------------------------------------------------------------------------------------------------------------------------------------------------------------|------------------------------------------------------------------------------------------------------|-------------------------------------------------------------------------------------------------------------------------------------------------------------------------------------------------|
| <p><b>EMAIL</b><br/>         Send as an e-mail attachment to<br/> <a href="mailto:celiaccenter@ucsd.edu">celiaccenter@ucsd.edu</a><br/>         (Please change filename to include your last name.)</p> | <p><b>FAX</b><br/>         Send to (858) 534-5691<br/>         (A cover sheet is not necessary.)</p> | <p><b>REGULAR MAIL- Send to:</b><br/>         UCSD - Warren Celiac Center<br/>         Attn: Screening Program<br/>         9500 Gilman Drive, MC0623D<br/>         La Jolla, CA 92093-0623</p> |
|---------------------------------------------------------------------------------------------------------------------------------------------------------------------------------------------------------|------------------------------------------------------------------------------------------------------|-------------------------------------------------------------------------------------------------------------------------------------------------------------------------------------------------|
